# Supplementary material for: Evolution and dynamics of the vertical temperature profile in an oligotrophic lake
Source: Copernicus journal article supplement (doi:10.5194/hess-24-3399-2020), 2020-07-03

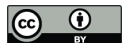

*Supplement of*

## **Evolution and dynamics of the vertical temperature profile in an oligotrophic lake**

**Zvezdana B. Klaić et al.**

*Correspondence to:* Zvezdana B. Klaić ([zklaic@gfz.hr](mailto:zklaic@gfz.hr))

The copyright of individual parts of the supplement might differ from the CC BY 4.0 License.

## SUPPLEMENT 1

Power spectral densities computed from hourly mean lake temperatures measured at individual depths during 6 July – 5 November 2018 (left) and during 1 – 20 September (right), where the latter correspond to weaker winds. Corresponding window lengths are 512 and 32, respectively. Black vertical line shows 24 h period.

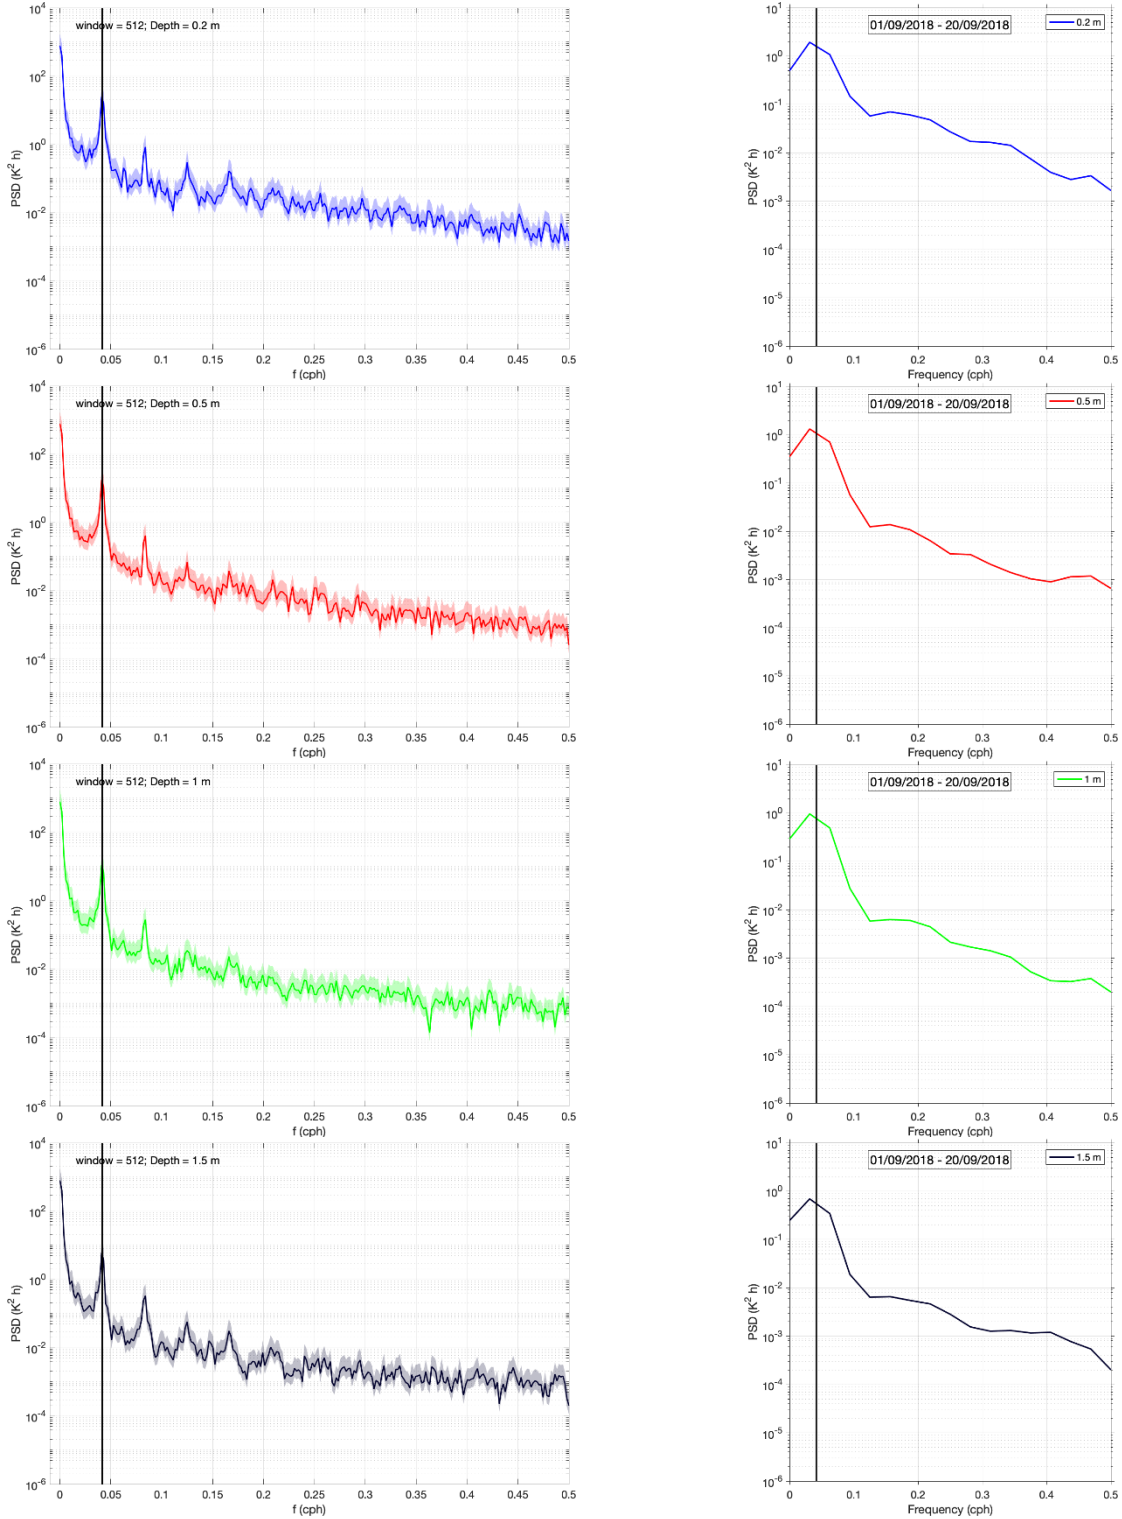

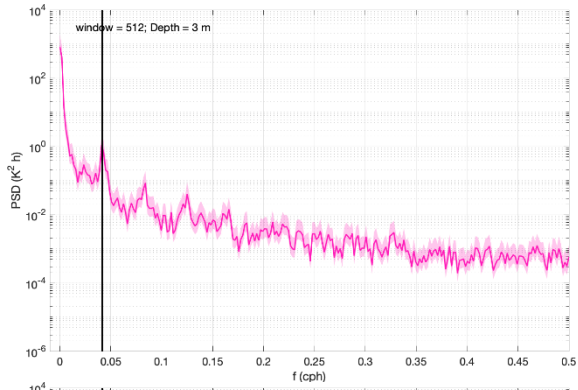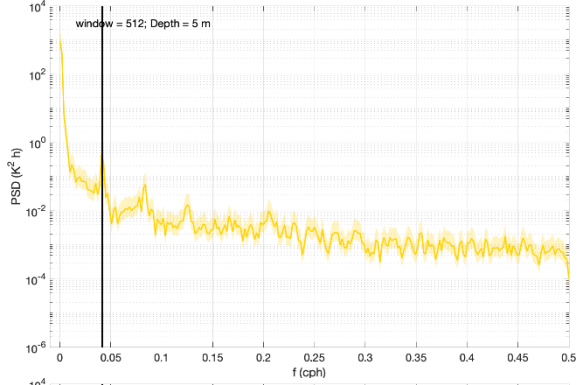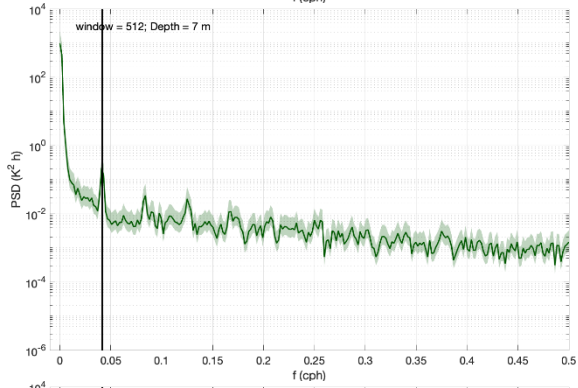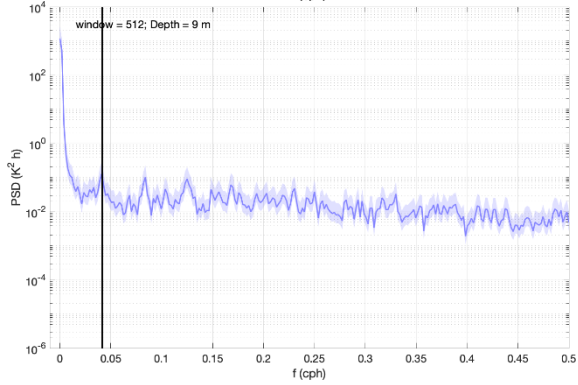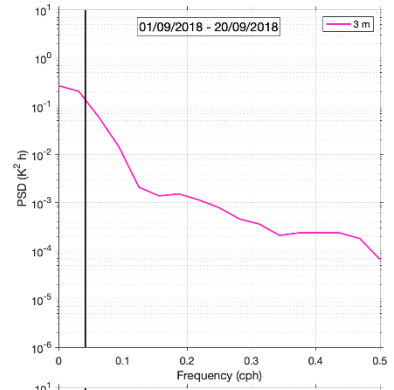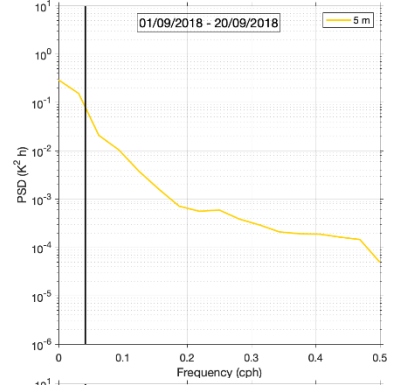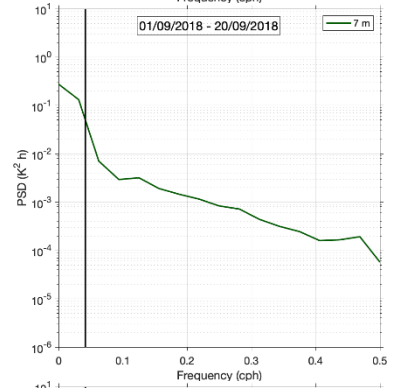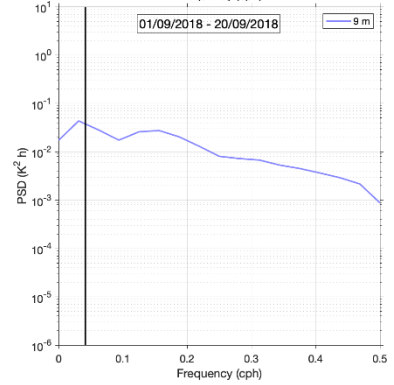

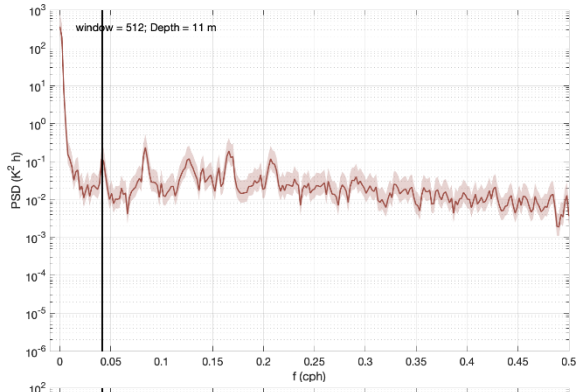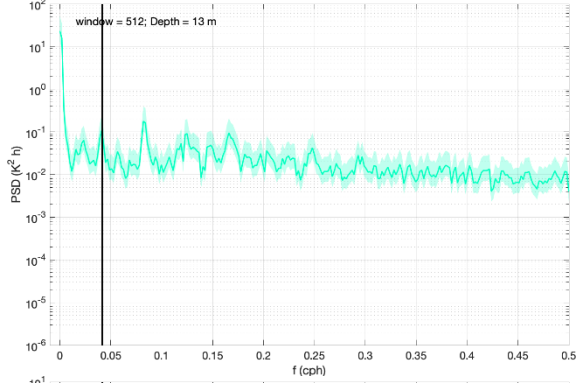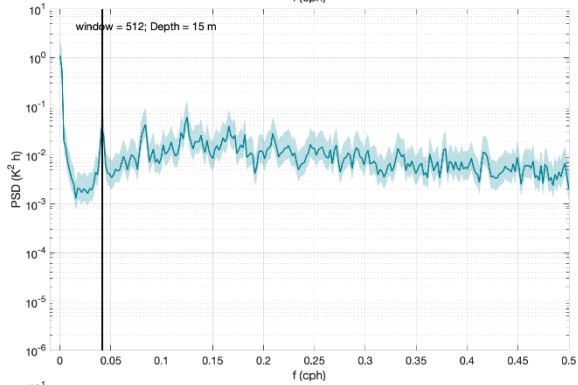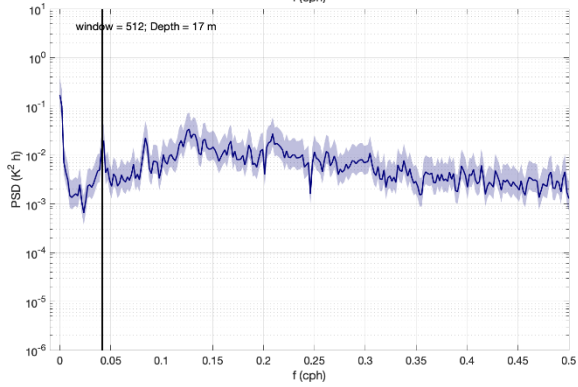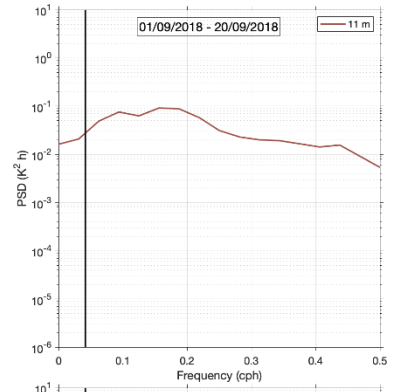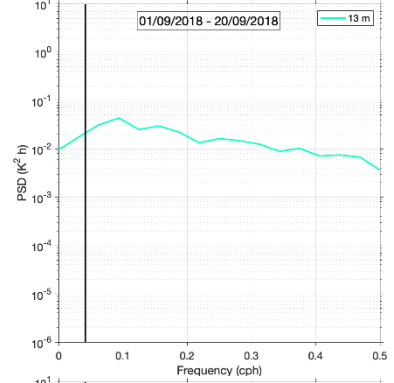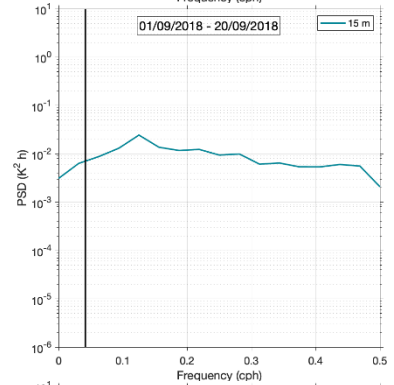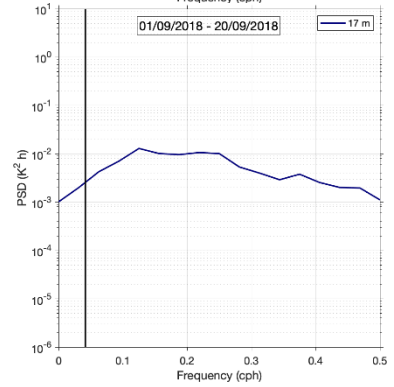

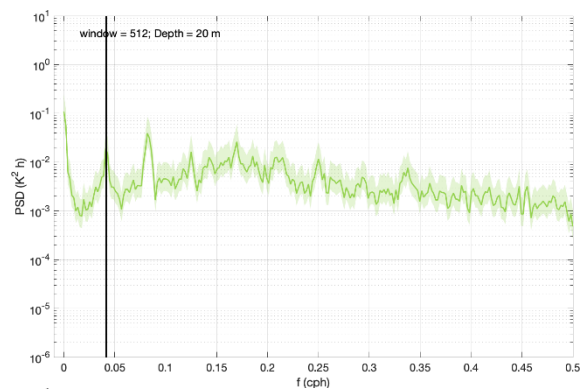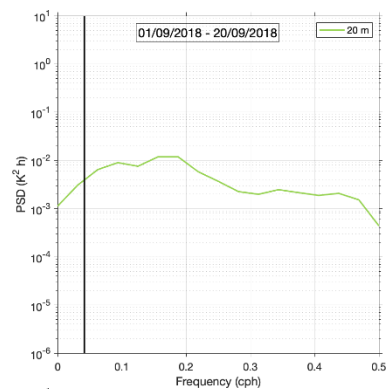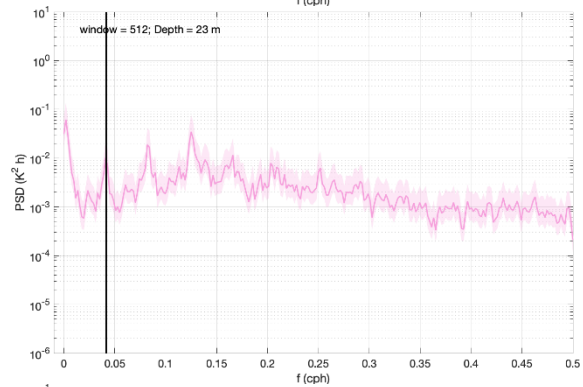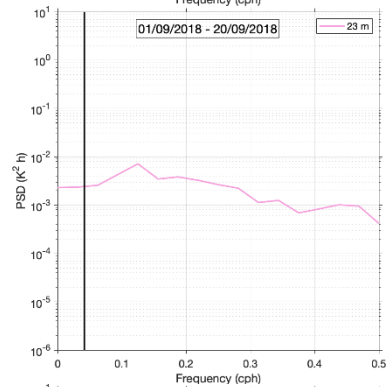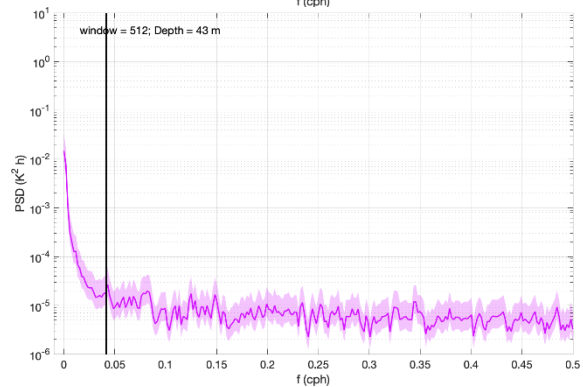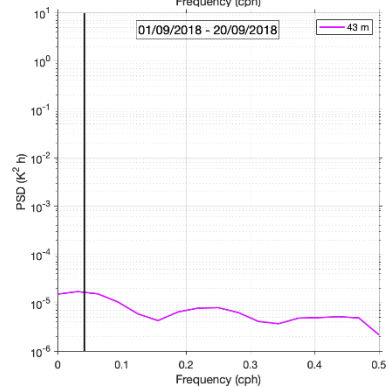

## SUPPLEMENT 2

Power spectral densities computed from 2-min mean lake temperatures measured at various depths during 6 July – 5 November 2018.

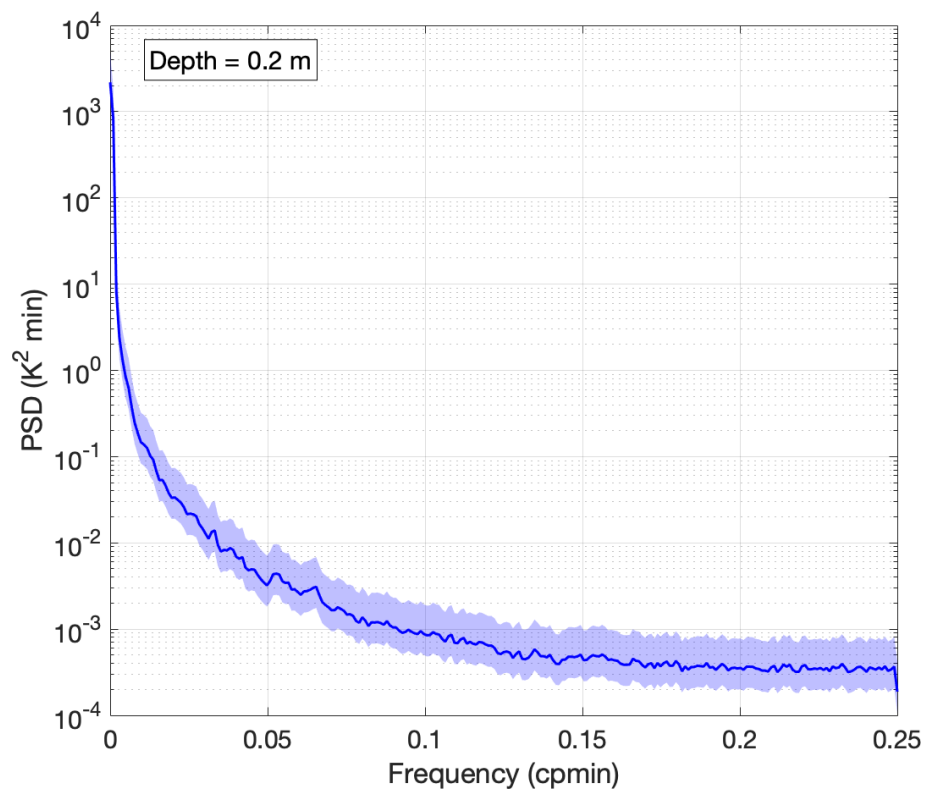

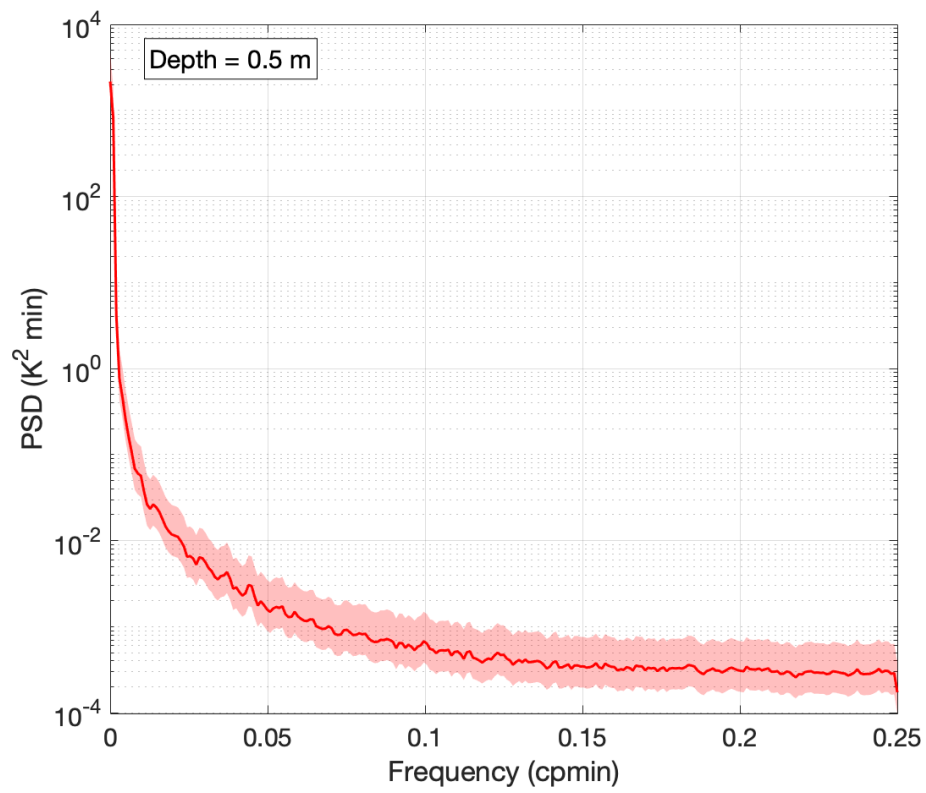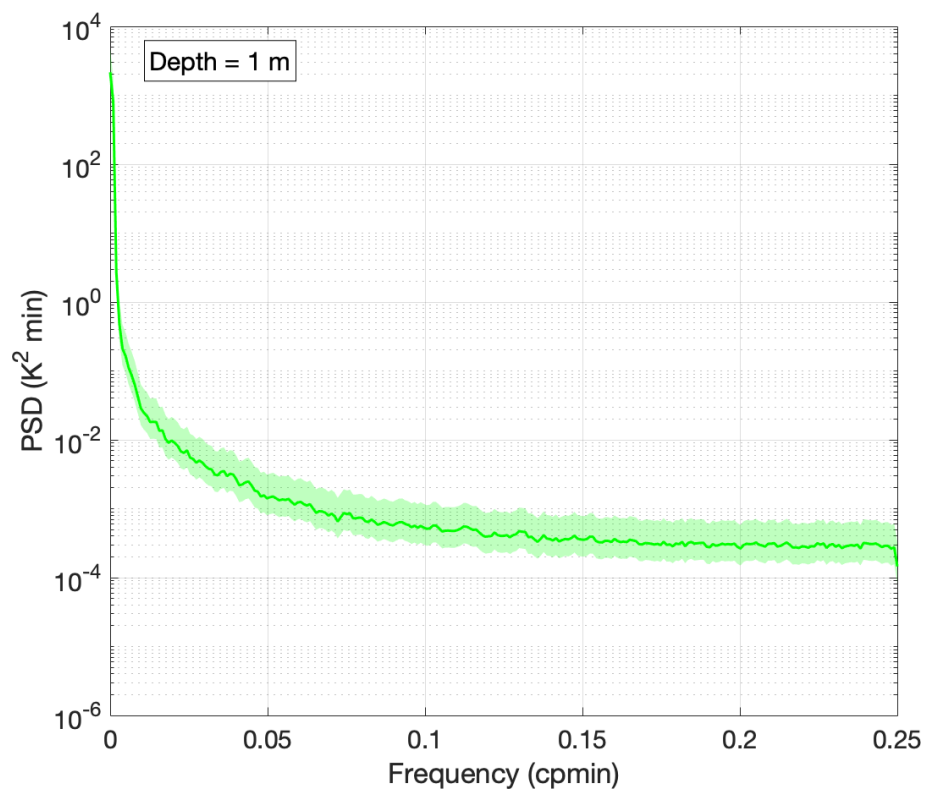

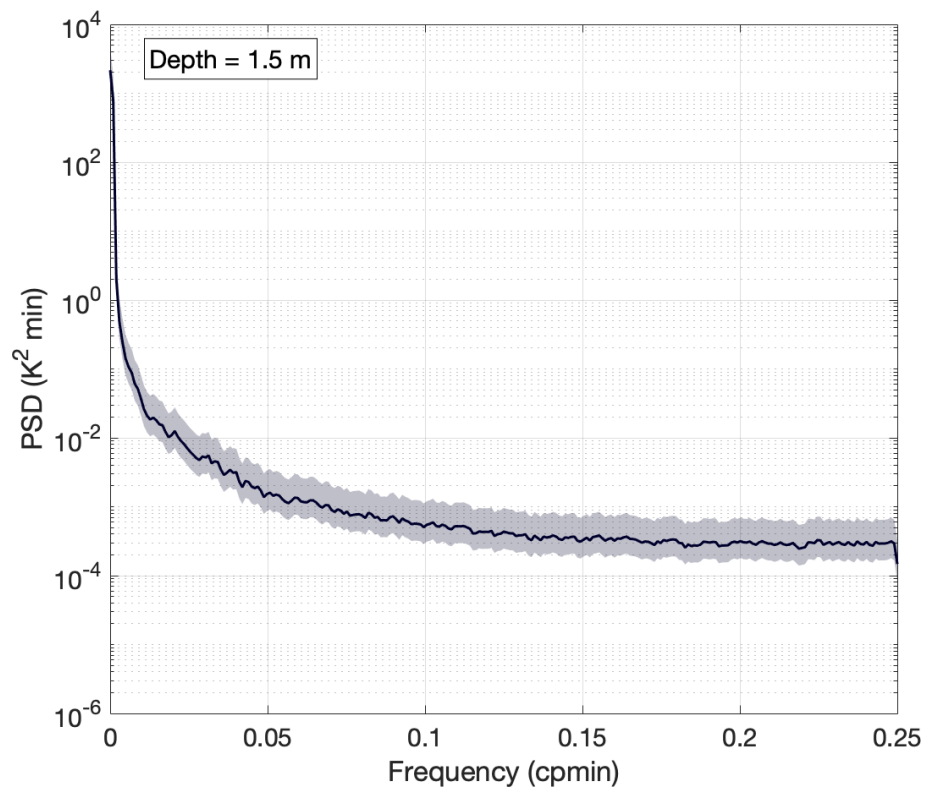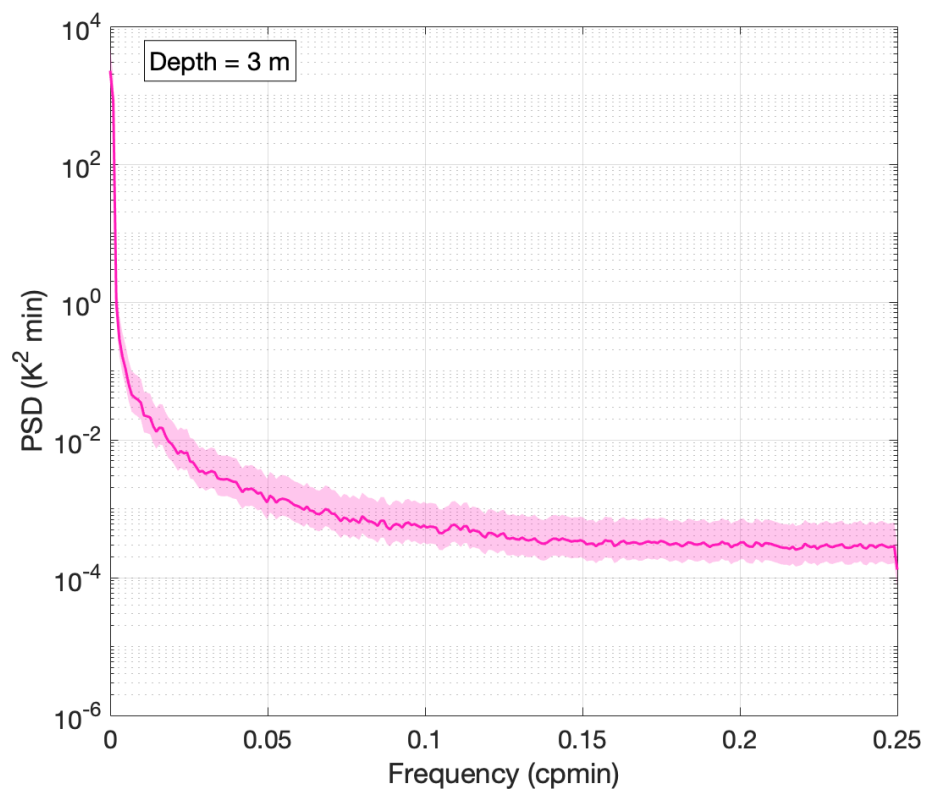



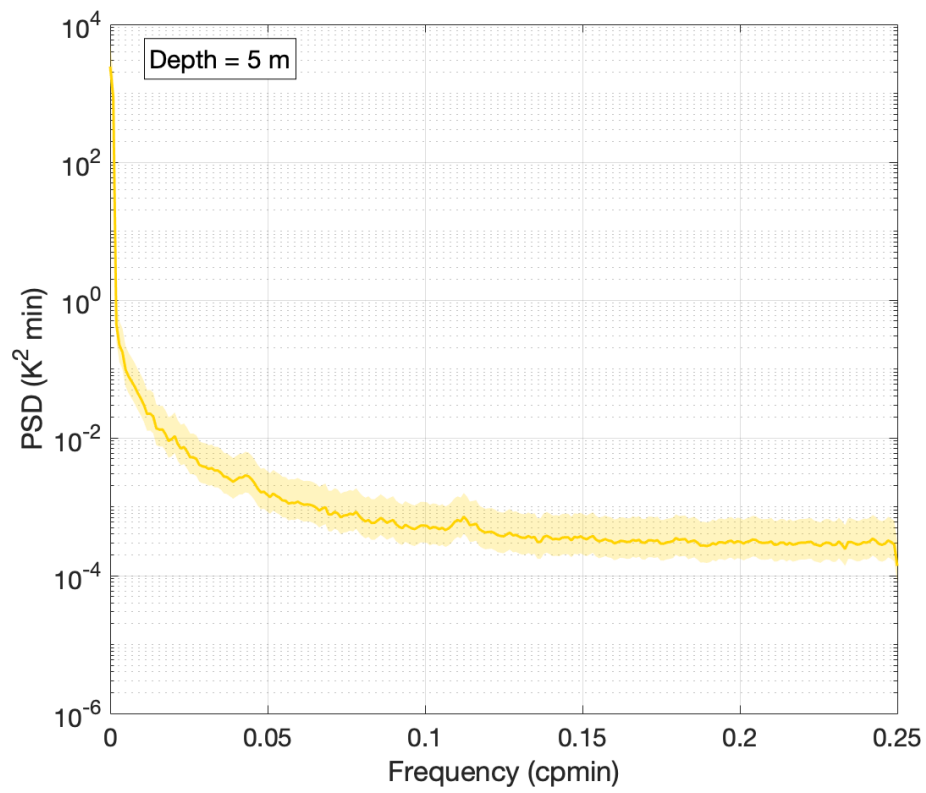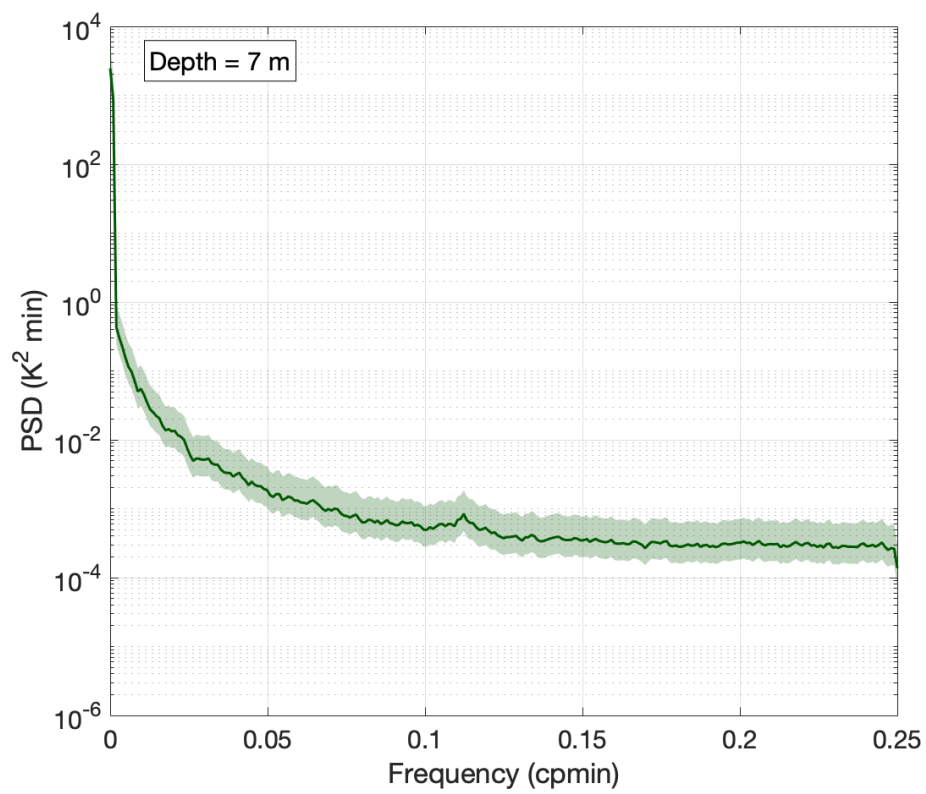

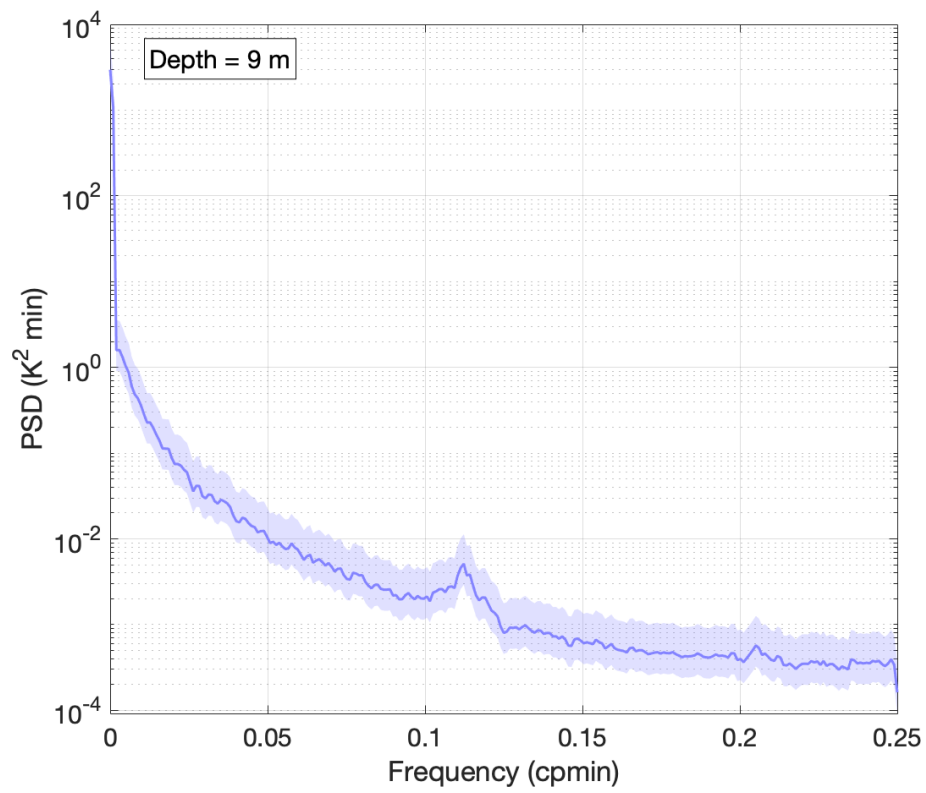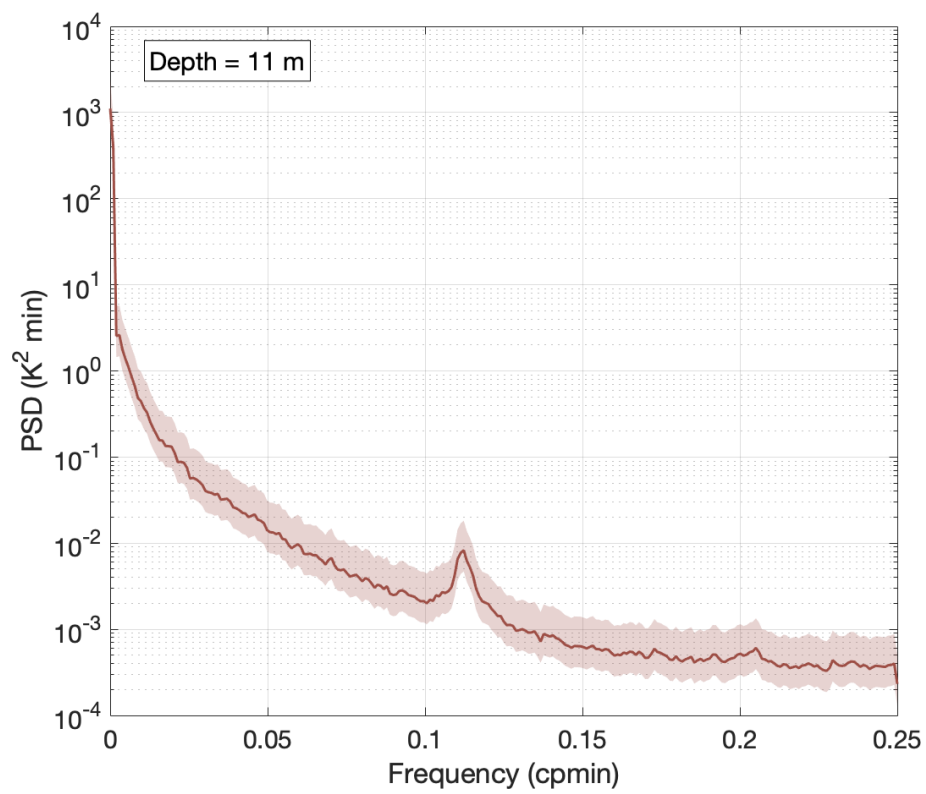

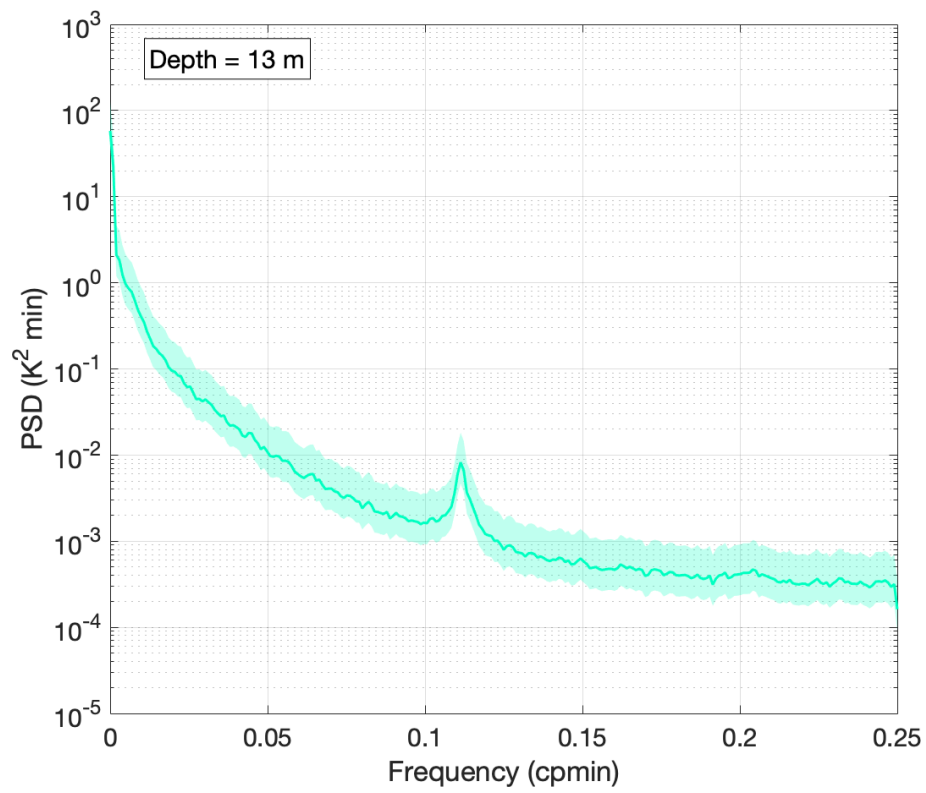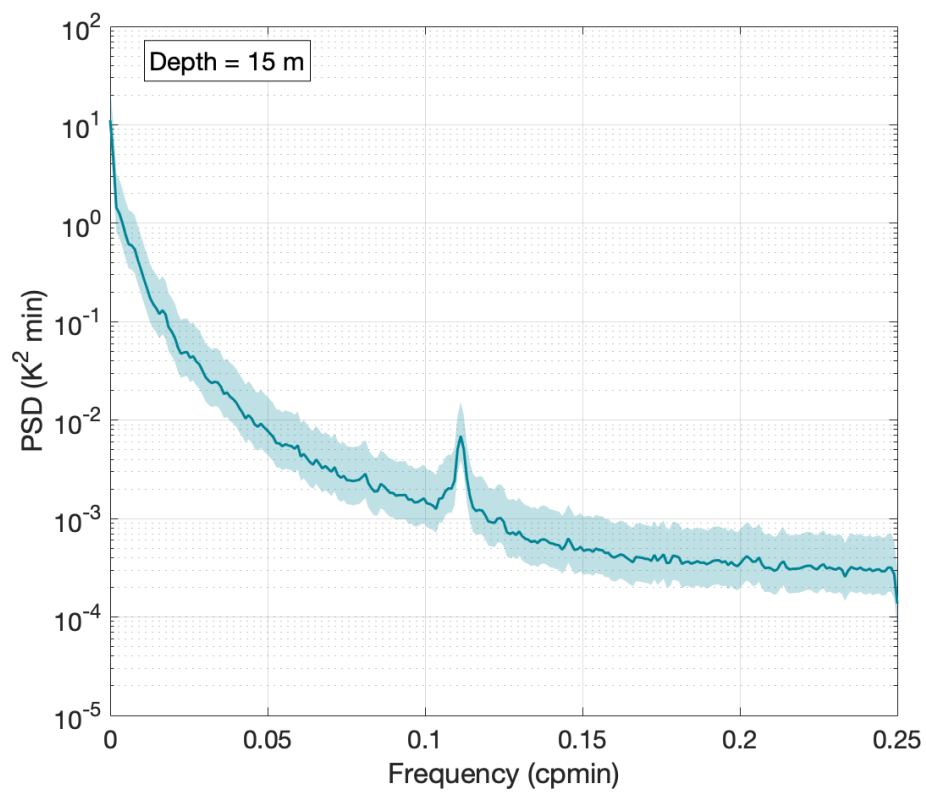

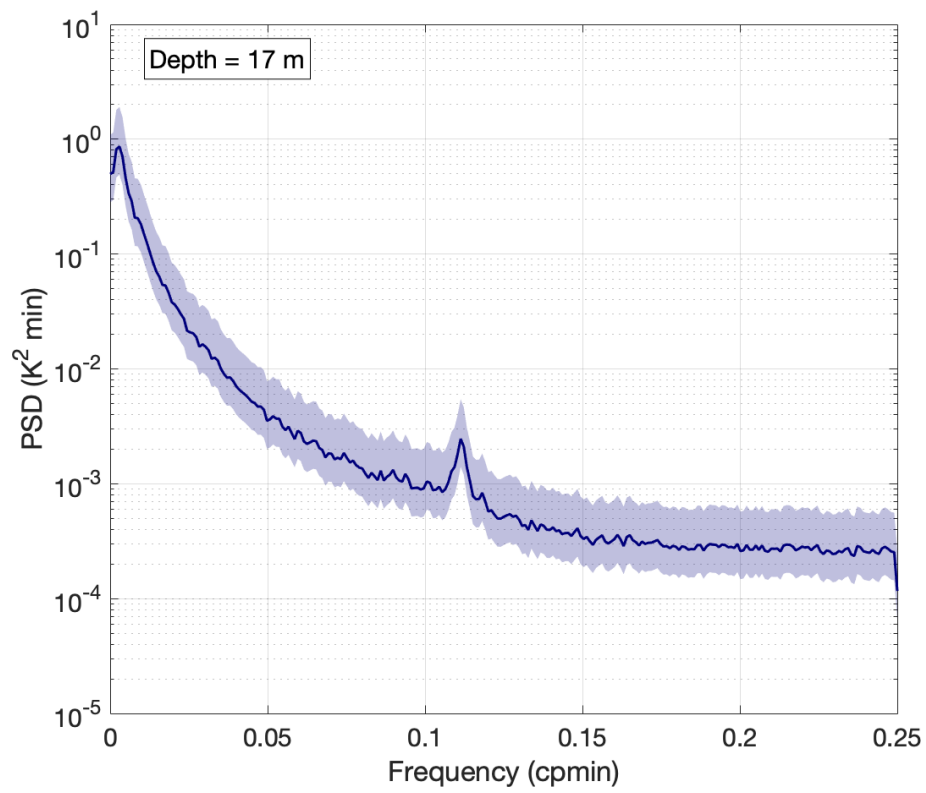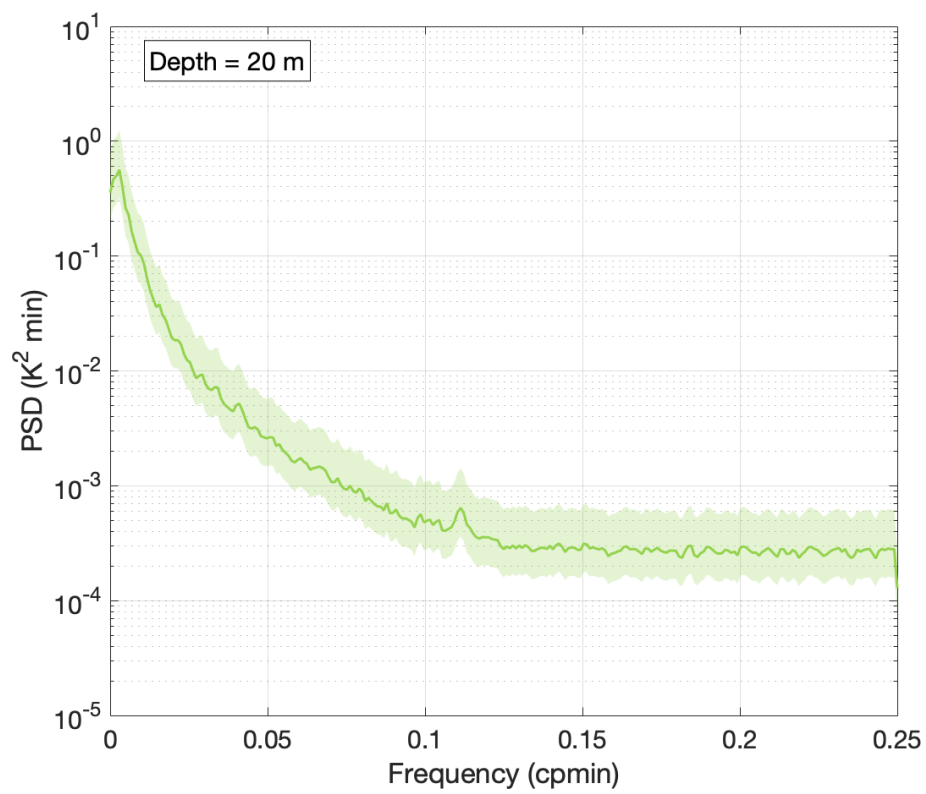

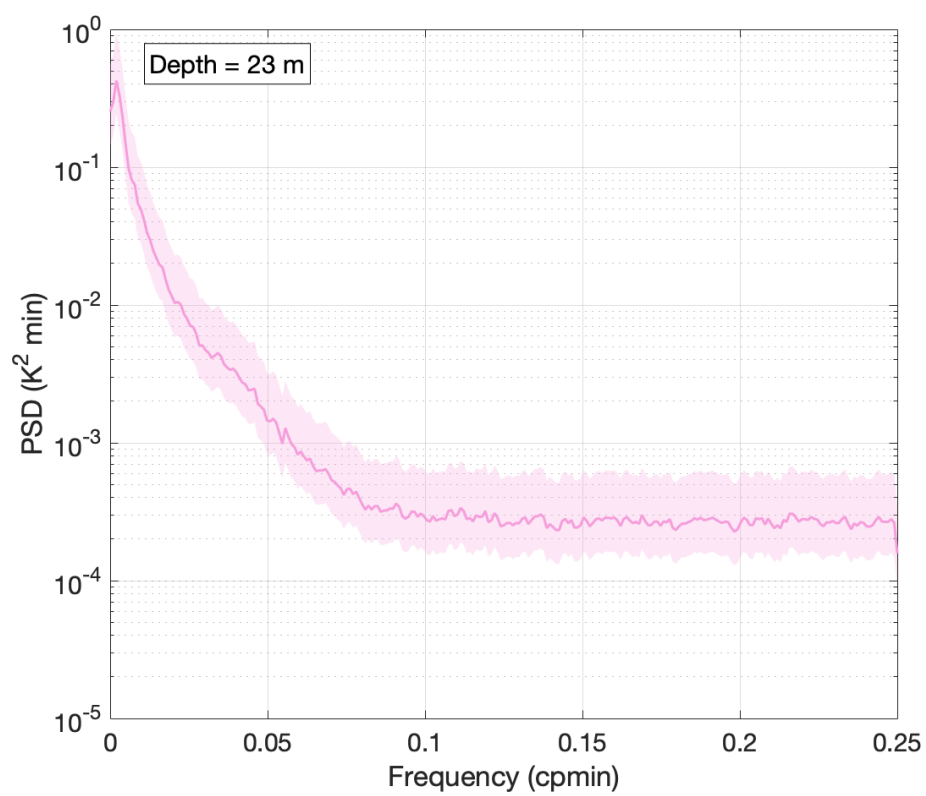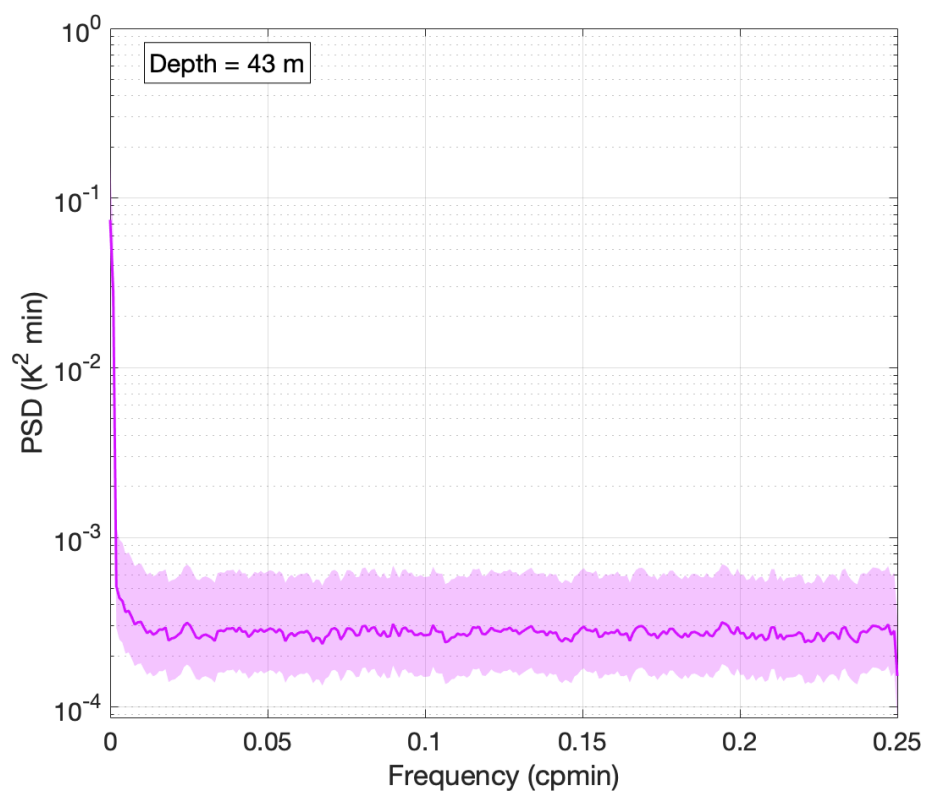

Supplement: Supplementary file 1 [file hess-24-3399-2020-supplement.pdf]
